# Supplementary material
Source: PubMed Central journal article supplement (PMC1636560)

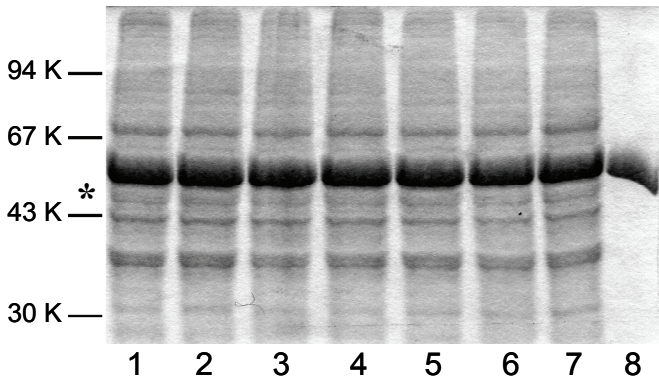

Supplement: pnas_0601562103_1.pdf [file pnas_0601562103_1.pdf]

methionine incorporation  
[cpm x 10<sup>3</sup>]

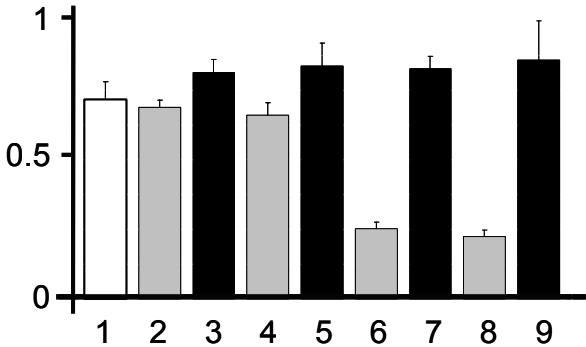

Supplement: pnas_0601562103_2.pdf [file pnas_0601562103_2.pdf]
